# Supplementary material for: Engineering superlyophobic surfaces as the microfluidic platform for droplet manipulation
Source: Royal Society of Chemistry journal article supplement (doi:10.1039/c0lc00513d), 2011-01-01
Supplement: c0lc00513d.pdf [file c0lc00513d.pdf]

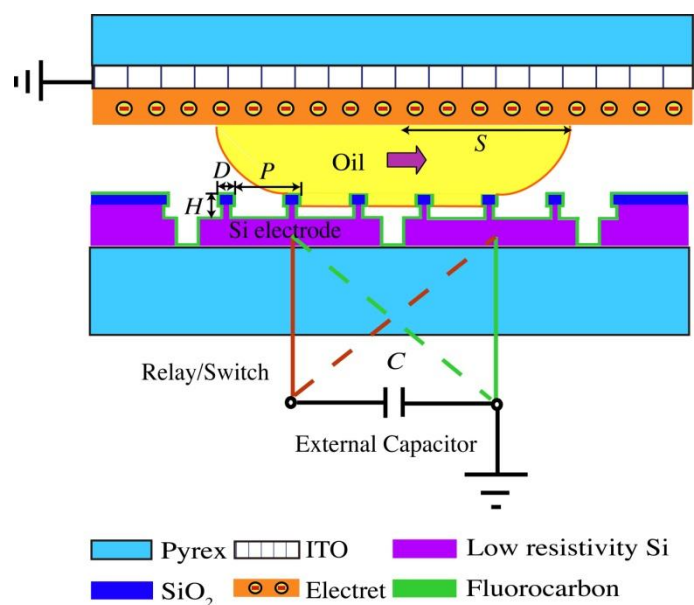

**Fig. S6** Oil droplet electrically driven by L-DEPOE<sup>3</sup> on SLS. The bottom flat substrate with two electrodes in a standard L-DEPOE configuration is replaced by SLS with the discrete configuration. When the external capacitor C switches to the left side, the electrostatic force moves the oil droplet to the right side.

To model the droplet motion on SLS,<sup>3</sup> the CAH on the flat substrate is replaced with the effective CAH of SLS. The major parameters for the simulation are shown as following.

**Table S6.** Simulation parameters for droplet transport on SLS by L-DEPOE.

| External capacitance<br>$C$ (pF) | Relay resistance<br>$R$ (M $\Omega$ ) | Viscosity<br>$\mu$ (cSt) | Liquid resistivity<br>(G $\Omega \cdot m$ ) | electret surface voltage(<br>mC/m <sup>2</sup> ) | Electret thickness<br>( $\mu m$ ) | gap height<br>( $\mu m$ ) | Contact line friction factor $\zeta$ |
|----------------------------------|---------------------------------------|--------------------------|---------------------------------------------|--------------------------------------------------|-----------------------------------|---------------------------|--------------------------------------|
| 5                                | 400                                   | 10                       | 100                                         | 1.4                                              | 20                                | 150                       | 6                                    |
